# Supplementary material for: 24-h-Ambulatory Blood Pressure Monitoring in Sub-Saharan Africa: Hypertension Phenotypes and Dipping Patterns in Malawian HIV+ Patients on Antiretroviral Therapy
Source: PubMed Central journal article supplement (PMC8516010; doi:10.5334/gh.945), 2021-10-13
Supplement: gh-16-1-945-s1.pdf [file gh-16-1-945-s1.pdf]

**Supplemental Table 1: Enrolled vs. not enrolled PLHIV for the LightTen ABPM sub-study**

|                                             | Self-reported hypertension              |               |                                      | Newly detected hypertension            |               |                                        | Raised BP                              |               |                                        |
|---------------------------------------------|-----------------------------------------|---------------|--------------------------------------|----------------------------------------|---------------|----------------------------------------|----------------------------------------|---------------|----------------------------------------|
|                                             | Enrolled (n=40)                         | p-value       | Not enrolled (n=9)                   | Enrolled (n=39)                        | p-value       | Not enrolled (n=34)                    | enrolled (n=38)                        | p-value       | Not enrolled (n=108)                   |
| Gender (f/m)                                | 29/11                                   | 0.746         | 7/2                                  | 16/23                                  | 0.541         | 16/18                                  | 14/24                                  | 0.322         | 51/57                                  |
| WHO stage 1                                 | 17                                      | 0.746         | 2                                    | 26                                     | 0.979         | 22                                     | 15                                     | 0.561         | 53                                     |
| WHO stage 2                                 | 11                                      |               | 4                                    | 4                                      |               | 3                                      | 7                                      |               | 22                                     |
| WHO stage 3                                 | 11                                      |               | 3                                    | 6                                      |               | 7                                      | 15                                     |               | 28                                     |
| WHO stage 4                                 | 1                                       |               | 0                                    | 3                                      |               | 2                                      | 1                                      |               | 5                                      |
| age (years)                                 | 44.5 (35.3-47.8)                        | 0.126         | 38.0 (30.5-43.5)                     | 43.0 (38.0-52.0)                       | 0.070         | 40.0 (32.5-47.0)                       | 41.5 (30.0-49.5)                       | 0.538         | 39.0 (33.0-44.8)                       |
| BMI (kg/m <sup>2</sup> )                    | 27.7 (23.3-30.5)                        | 0.810         | 27.5 (23.8-30.6)                     | 27.1 (22.5-30.8)                       | 0.436         | 24.8 (23.4-27.3)                       | 24.6 (21.7-27.0)                       | 0.307         | 24.0 (21.0-26.8)                       |
| CD4 cell count/ $\mu$ l                     | 314 (110-419)                           | 0.157         | 391 (237-722)                        | 317 (178-405)                          | 0.609         | 295 (186-383)                          | 207 (133-413)                          | 0.653         | 241 (133-407)                          |
| eGFR (ml/min/m <sup>2</sup> )               | 88.5 (67.3-104.8)                       | 0.468         | 92.0 (78.0-106.5)                    | 89.0 (74.0-104.0)                      | 0.117         | 93.5 (83.8-110.8)                      | 88.0 (73.8-105.8)                      | 0.265         | 96.0 (76.0-109.0)                      |
| OBP study entry sys/dia (mmHg)              | 138.0 (115.3-168.5) / 90.5 (71.0-110.3) | 0.500 / 0.675 | 133.0 (110.0-156.5) / 87 (71.5-99.0) | 144.0 (139.0-158.0) / 93.0 (82.0-97.0) | 0.821 / 0.912 | 144 (134.5-152.3) / 93.5 (87.3-98.0)   | 124.0 (118.5-135.5) / 78.0 (73.0-88.0) | 0.851 / 0.466 | 125.5 (113.0-140.0) / 81.0 (72.0-91.0) |
| OBP last visit prior to ABPM sys/dia (mmHg) | 133.5 (113.0-166.0) / 86.0 (74.3-102.0) | 0.423 / 0.366 | 127.0 (112.5-135.5) / 79 (72.0-88.5) | 133.0 (126.0-145.0) / 88.0 (80.0-94.0) | 0.153 / 0.872 | 139.0 (129.5-150.0) / 90.0 (76.0-97.0) | 122.0 (110.0-134.5) / 81.0 (72.5-92.5) | 0.330 / 0.787 | 127.0 (116.0-138.0) / 83.0 (75.0-90.0) |

WHO, World Health Organization; BMI, body mass index; eGFR, estimated glomerular filtration rate; OBP, office blood pressure; sys, systolic blood pressure; dia, diastolic blood pressure; ABPM, ambulatory blood pressure monitoring. Chi<sup>2</sup>-test for categorical variabes and Mann Whitney U-test for continuous variables, respectively.
